# Supplementary material for: 2-Benzazolyl-4-Piperazin-1-Ylsulfonylbenzenecarbohydroxamic Acids as Novel Selective Histone Deacetylase-6 Inhibitors with Antiproliferative Activity
Source: PubMed Central journal article supplement (PMC4689404; doi:10.1371/journal.pone.0134556), 2015-12-23

**S1 Fig: 18 h cell cycle FACS data**

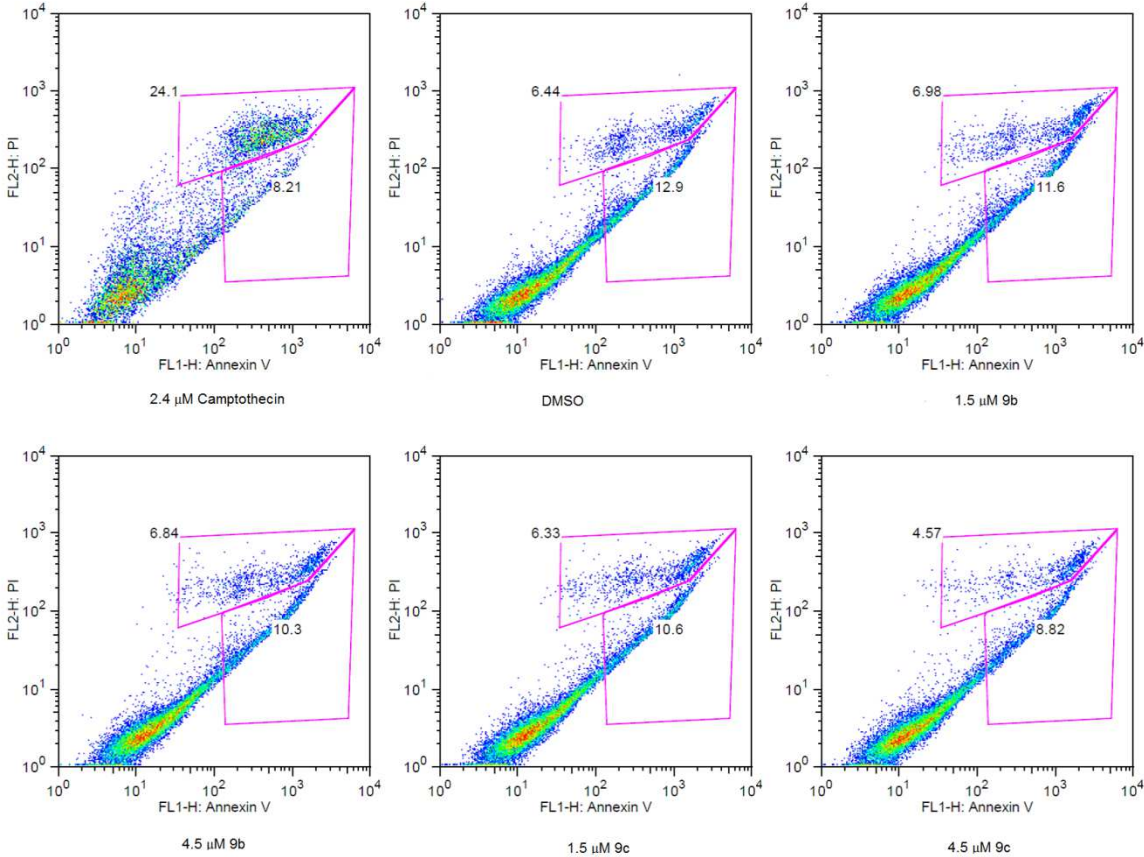

Supplement: pone.0134556.s001.pdf [file pone.0134556.s001.pdf]
